# Supplementary material for: A global map of Local Climate Zones to support earth system modelling and urban scale environmental science
Source: Copernicus journal article supplement (doi:10.5194/essd-2022-92), 2022-04-07
Supplement: Supplementary file [file essd-2022-92-AC1-supplement.pdf]

**Manuscript esd-2022-92, First Revision  
Submitted to: Earth System Science Data**

A global map of Local Climate Zones to support earth system modelling and urban scale environmental science

Demuzere, M., Kittner, J., Martilli, A., Mills, G., Moede, C.,  
Stewart, I. D., van Vliet, J., and Bechtel, B.

**Response to Referee #1**

***July 14 2022***

We thank the chief editor and the reviewers for their appreciation of our work and the valuable comments on the manuscript. Please find the point-by-point responses below, indicated in [blue](#).

**General comments**

The paper entitled "A global map of Local Climate Zones to support earth system modelling and urban scale environmental science" depicts the major advancements realised by the community effort led by the WUDAPT community that permitted the obtention of the first global Local Climate Zones map. The paper is already in a very mature state and no major points of concern are to be clarified. The paper should therefore be published once the comments given below are treated. Some specifications are required in the methods. But most importantly, I would like to have the authors commenting more on the quality of the training polygons and the sampling bias per ecoregion. This could help focus future efforts by the community to improve the current map in future releases.

[Thanks for reviewing our research paper, and supporting its publication after addressing the comments described below.](#)

**Major comments**

Line 120: Please define what a well-trained student is.

[From previous works \(e.g. Bechtel et al., 2015, 2017; Verdonck et al., 2019\) we know that training of the human operator can improve the classification. This training includes an in-depth understanding of the LCZ scheme and its relevance in terms of urban climatology and thermal characterization of the urban environment, and an understanding of the guidelines that describe the optimal shape, size, frequency, siting, ... of the training area \(TA\) polygons.](#)

[All of this context was discussed thoroughly with the RUB students. Afterwards they practised with the LCZ driving test and by creating TA sets for a large number of known cities that were reviewed by local experts. At the same time, the LCZ Generator capabilities were also used, allowing the students to revise the training areas based on the internal quality control, and subsequently re-submitting the revised training area files until an OA of at least 70% was reached. In this respect note that contributions from RUB members are not visible on the LCZ Generator platform, as we also use the system for internal procedures and tests.](#)

[So in short, the way of training our students is generally inspired by the outcomes of HUMINEX, which is indicated accordingly in the revised manuscript.](#)

Bechtel B, Alexander P, Böhner J, et al. Mapping Local Climate Zones for a Worldwide Database of the Form and Function of Cities. *ISPRS Int J Geo-Information*. 2015;4(1):199-219. doi:10.3390/ijgi4010199

Bechtel B, Demuzere M, Sismanidis P, et al. Quality of Crowdsourced Data on Urban Morphology—The Human Influence Experiment (HUMINEX). *Urban Sci*. 2017;1(2):15. doi:10.3390/urbansci1020015

Verdonck M, Demuzere M, Bechtel B, et al. The Human Influence Experiment (Part 2): Guidelines for Improved Mapping of Local Climate Zones Using a Supervised Classification. *Urban Sci*. 2019;3(1):27. doi:10.3390/urbansci3010027

Line 127 to 129: How is the best submission defined? If solely on overall accuracy (OA), then this can be biased. Why not using all submissions instead, as suggested by the HUMINEX project. Explain why 50% is retained and not 60% as suggested by Bechtel et al. (2019). Please explain the rationale in a short sentence. Also, why are archived TAs given a higher priority over the ones produced in the Generator? Were they checked or published before being archived? Some places are mostly sampled via the Generator (e.g., India or China), would you say that the resulting mapping in these ecoregions are of lower quality?

For a first filtering, we indeed keep all submissions with OA => 50%. This is a balance between the guidelines of Bechtel et al. (2019) (“a minimum average accuracy of 50% is required for each accuracy measure to pass the automated quality control before”), and retaining enough samples on the global scale, in line with the findings of HUMINEX that “poor to moderate quality TA sets can still contribute to good quality LCZ maps”.

As stated in the manuscript, archived TAs are “collected from previously published research and collaborations, including the samples hosted on the old WUDAPT portal”. That means that most of these samples have undergone some sort of external quality control, and are hence given priority over those submitted directly to the LCZ Generator, for which we do not know whether or not they have been (externally) quality controlled.

On the China and India TA sets: I would not assume the resulting LCZ map for these regions is of lower quality. Many of the Indian sets were actually double-checked by some of the co-authors, and TA polygons were often labelled as suspicious, mostly because of their shape or size not being according to the guidelines. These polygons are removed via the shape/size filter as mentioned in the manuscript: “too small or too complex TA polygons are removed”. Many of the Chinese TA sets submitted to the LCZ Generator are actually also used in peer-reviewed publications, and as such have undergone some sort of external review as well.

The above does of course not remove all uncertainty embedded within the TA sets from the LCZ Generator, but also here we assume that their volume (these areas have relatively much more TA sets compared to other ecoregions) serves the wisdom of the crowd idea (Bechtel et al., 2017, Verdonck et al., 2019), still resulting in good quality LCZ maps.

Bechtel B, Alexander PJ, Beck C, et al. Generating WUDAPT Level 0 data – Current status of production and evaluation. *Urban Clim*. 2019;27:24-45. doi:10.1016/j.uclim.2018.10.001

Line 169 to 174: You say it in the following paragraph but it is unclear at this stage why you do the feature importance for the 16 sets of TAs. Also, why is the performance measured at that stage and not in GEE? Could you also be a bit more specific on the reasons that explain you going from GEE to a python environment? Could be interesting for some geospatial scientists.

Since the feature importance results of the 16 spatial regions are only used in Pathway 2, we believe it is appropriate to keep that information in that section only, and not already to describe its purpose in the Pathway 1 section.

The main reason for doing Pathway 1 offline is provided in the original Line 164, referring to the sheer size of the classification problem (2+ million labels and 46 input features). Trying to solve this in EE results in exceeding the available user memory limit or leads to a computation time out. This information is now added to the revised manuscript.

Line 184 to 185: I like that step and fully support it. Nonetheless, there may be a bias induced by the quality of the TA per ecoregion (e.g., TAs coming only from the Generator). This should be discussed at a certain point.

To clarify: for each of the 5 seed iterations, 10% of all selected TA sets are used, that are balanced across LCZ class labels and ecoregions. That means that in reality, each subset will be composed out of a mixture of global RUB, ARC and GEN TA samples. These subsets are subsequently used to make one global LCZ map, which is then repeated 50 times (5 seeds, 10 iterations per seed). Given this mixture of types of TA sets in each iteration, we don't think this will introduce a bias in the LCZ map quality. We clarified in the manuscript that TA sampling is done from all selected TA sets.

Line 192 and 193: I had a hard time understanding why you calculate the accuracy again for each subset after going through Pathway 1.

The accuracies from Pathway 1 are obtained using all 46 original input features and a type of TA sampling. As the final LCZ map is produced in Pathway 2, using only 30 input features and a different type of TA sampling, we want to make sure that the final accuracy assessment matches the underlying procedure that was used to create the global LCZ map. Some notes have been added in the text to make this difference more clear.

Line 249: Do you know how the GHS-S2net data performs in places where informal settlements are common and where roads are made of bare soil rather than asphalt? This could impact your evaluation.

As far as we know, there are no global high-resolution layers on building surface fraction and imperviousness. Because of this, we only assessed the representativity of the GHS-S2net data for these properties over Europe, using EEA's datasets. That of course excludes certain types of urban forms that do not exist in Europe.

Yet this benchmark with EEA data was merely an additional test, to double-check the findings of Corbane et al. (2021), who state that *there is a strong relationship between the GHS-S2net output probabilities and the building densities*. Their findings are based on using building footprints from 277 regions across the globe. The latter reference database is described in more detail in Corbane et al. (2019): *"It is a reference spatial database including single building delineation (more than 40 million individual building polygons) derived from digital cartography, at a nominal scale of 1:10,000, compiled to have the most possible representative sample set from different cities around the globe"*.

From Figure R1 below one can see that, even though the majority of building footprints are sampled in developed regions, the dataset also contains information from less-developed countries. But since the GHS-S2net data is found to be a proxy for building footprints, and is used as such in the manuscript, we don't think this has an impact on our evaluation.

Note that the Corbane et al. (2019) reference is added in the revised manuscript to more clearly point to the characteristics of the reference data.

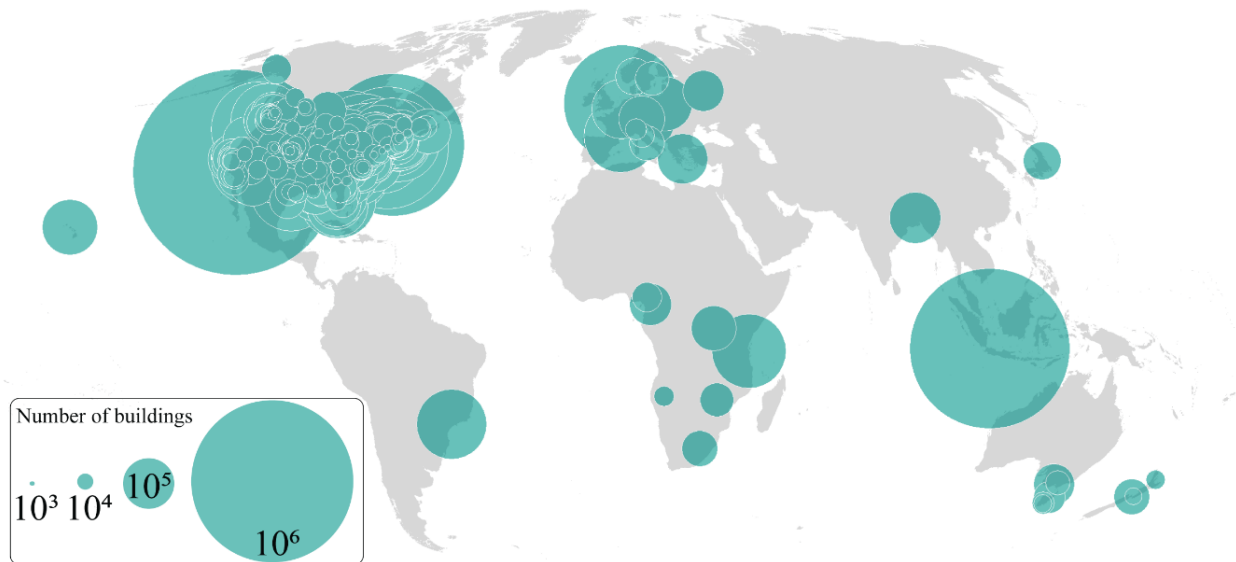

**Figure R1.** Location of the 277 Areas of Interest used in the validation and the number of building footprints within each of them (Corbane et al., 2019, their supplementary File 2, Figure 1).

Corbane C, Pesaresi M, Kemper T, et al. Automated global delineation of human settlements from 40 years of Landsat satellite data archives. *Big Earth Data*. 2019;3(2):140-169. doi:10.1080/20964471.2019.1625528

Corbane C, Syrris V, Sabo F, et al. Convolutional neural networks for global human settlements mapping from Sentinel-2 satellite imagery. *Neural Comput Appl*. 2021;33(12):6697-6720. doi:10.1007/s00521-020-05449-7

Line 288 to 290: Looking at the TAs on the LCZ Generator, one can see that in the Indian cities, for example, close to no LCZ 7 has been sampled. Coming back to the question of the TA quality in certain places, how do you think this could influence your global map? Also, could it be that some users do not take sufficient time to get acquainted with the LCZ scheme? Would your TA filtering capture this?

As can be seen from Figure E1, LCZ class 7 indeed has the least amount of polygons, across all urban ecoregions. It is therefore likely that this LCZ class is under-represented in our TA database, which of course has repercussions for the representation of this LCZ class in the global LCZ map. This is also identified within the manuscript, by eg. pointing to the lowest LCZ probabilities for this class (Lines 359-360 in original manuscript). More in general, the representation of LCZ 7 in the global map is highlighted as the first limitation (“For example, LCZ 7 requires more attention and alternative mapping strategies” - Line 509 in original manuscript), and we agree that this class needs further attention in the future, as stated in Lines 363-365: “For this LCZ type, future versions of the global map might benefit and built further upon recent efforts dedicated to map informal urban settlements (see e.g. Kuffer et al., 2020; Assarkhaniki et al., 2021; Owusu et al., 2021; Abascal et al., 2022).”

As mentioned previously, it is clear that our TA filtering procedure can not remove all uncertainty embedded within the TA sets. But we do believe that the volume of training pixels used in the training of the LCZ classification models allows for the development of a good quality global map.

Figures 5, 6 and 7 and related text: I would like the authors to comment more about the probability of a certain LCZ to occur in different FUAs. In Lagos, for example, the probability of having the same LCZ classified is higher in the city and lower in the rural area. This is the opposite for a city like Delhi or Lima. Could you try to explain and discuss how the quality of the TA sampling done in the different ecoregions may lead to such outcome?

For clarity, the probability does not indicate the probability of a certain LCZ to occur in a certain FUA. Yet is it the number of times the 50 RF models mapped the modal LCZ, serving as an indicator of the robustness of the LCZ class label for a particular pixel. The meaning of this probability layer is included in the text: *“In addition, a classification probability layer is produced that identifies how often the modal LCZ was modelled per pixel (e.g. a classification probability of 60% means that the modal LCZ class was mapped 30 times out of 50 LCZ models)”*. However, in order to avoid confusion, we have changed all occurrences of *“probability”* to *“classification probability”*, to clarify that this is not the probability of a LCZ label to occur somewhere, but the probability of the 50 RF models to classify the final modal LCZ.

The classification probability maps that are shown in Figs. 5-7 are discussed in more detail in Section 3.2 and Figure 9. We do think that the latter section and figure already provides a good overview of the robustness of each mapped LCZ class, per urban ecoregion. For example, for LCZ 2, the mean classification probability over all 13000 FUA's is ~60%, with mean values to vary between ~50% (ER6) and ~70% (ER12) when stratified according to urban ecoregions. Or for LCZ D: ~75% (global), ~65% (ER7) and ~82% (ER8).

We believe that on this scale, it is not very informative to discuss differences between individual LCZ classes, FUAs and/or ERs. What this section 3.2 and Figure 9 however describes is that *“all classification probabilities per LCZ class are in line with the global values, demonstrating the universality of the LCZ typology and the robustness of the classifiers and input features across the urban ecoregions”*. It also indicates areas where more work is needed, such as the mapping of LCZ class 7, as discussed above. Also, given the current balanced sampling across all selected TAs - with a mixed set of TAs informing every single classifier - we don't think this strategy influences the quality of the map. Instead, these classification probabilities are more indicative of how difficult it is for the classifiers to recognise specific LCZ classes (e.g. LCZ 6 performs better than LCZ 7, or LCZ A better than LCZ C), providing directions for future work.

Finally, note that, as requested by the reviewer, Fig. 9 is also displayed as a function of ER instead of LCZ class. See below, or Figure H1 in the new Appendix H of the revised manuscript.

Line 331: Does the LCZ 8 class really belong in this cluster? Shouldn't it be added to the group with LCZ 7 and 10? Afterall, the building materials of LCZ 8 are very different to the compact built-up LCZs.

As stated in the manuscript (Lines 330-331), the grouping is first of all done *according to their degree of total impervious fraction*. As such we decided to put LCZ 8 in the HIGH- $\lambda_T$  cluster.

Line 339: Although I do believe that LCZ 3 and LCZ 8 are indeed the most common LCZ globally, the proportion of LCZ 8 over LCZ 3 may be biased because some confusion is happening during the classification. Could you try to explain why such confusion is happening between these two classes? You later speak about their radiative ressemblance (on line 511). Do you have any data to support this?

Since the LCZ map is the product of a machine learning technique, all LCZ classes are subject to uncertainty, which is indicated by the sections dealing with accuracy assessment in general, and the information on the LCZ classification probability in particular. So all LCZ labels will be subject to confusion, as is the case for any (global) product that is the result of an automated algorithm (or even manual classification).

According to Figures 9, G1, and H1 - looking at the built LCZs only - the accuracies and classification are highest for LCZ 3 and 8 (and LCZ 6), indicating that the classifiers provide robust results for these classes. But even here, the classification is not perfect, and confusion might still



occur. This is especially visible for the LCZ map of Lima in Fig 7, that shows too large an extent of the city being mapped as LCZ 8, which in reality should be mapped as LCZ 3.

In order to understand the spectral characteristics of each LCZ class, we've done an extensive qualitative assessment of their spectral profiles (analogues to the analysis done in Demuzere et al., (2019), their Figure 2) during the model development (not shown in the manuscript). This helped to understand the results of the automated EO input feature importance and the RF models. See eg. Figure R2, that depicts the normalised input feature profiles for the top 10 input features for LCZs 3, 8 and the range for all built LCZs (1-10). Even though this is just a snapshot of the big data underlying the RF models, it does show that often LCZs 3 and 8 have similar spectral profiles, with value ranges that are often only a fraction of what is available amongst all built LCZ classes. As we think this information is not critical to the paper, and given that the manuscript already contains a large number of Figures and Appendices, we prefer not to elaborate on this in the manuscript. We did however rephrase this sentence in the manuscript to make it more clear: *“Confusion may also exist between classes with similar impervious and built-up surface fractions, characterised by similar spectral characteristics (not shown), which can lead to confusion between these classes (see e.g. the confusion between LCZs 3 and 8 in the LCZ map for Lima (Peru, ER11), Fig 7)”*

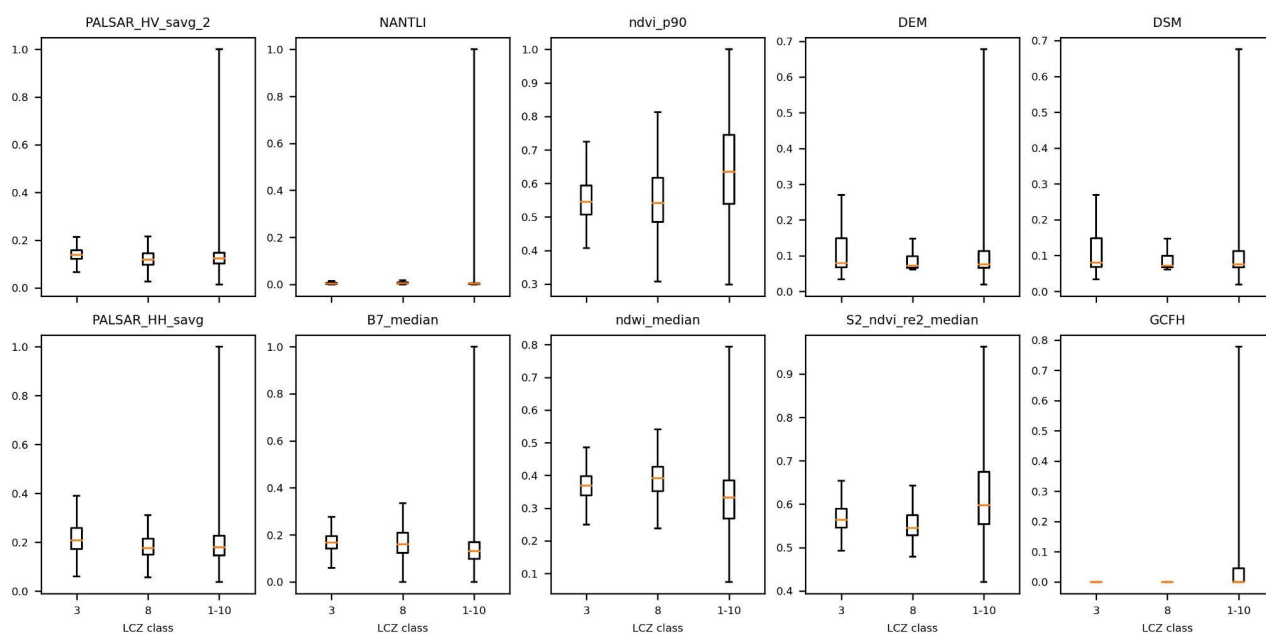

**Figure R2:** Normalised spectral profiles for LCZ classes 3, 8 and all built classes (1-10), extracted for all 2M+ TA pixels, for the top 10 earth observation input features (see Figure F1). Boxes and whiskers span the 25–75 and 0-100 percentiles respectively. The medians are indicated by the orange lines.

*Demuzere M, Bechtel B, Mills G. Global transferability of local climate zone models. Urban Clim. 2019;27(November 2018):46-63. doi:10.1016/j.uclim.2018.11.001*

Figure 8: I really like this figure but could you add an estimation of the uncertainty of the proportion per LCZ?

For the sake of clarity and readability, we'd prefer not to add an additional layer of information to this figure. In case a user is interested in the robustness of each LCZ class label per ER, he/she can interpret Figure 8 alongside Fig. 9.

Line 521: When you talk about "their purpose", could you add that users are invited to continue helping the development of future maps releases by contributing to the WUDAPT project through the LCZ Generator?

Thanks for this suggestion. We have added the following statement to this section: *“In addition, interested users are invited to actively contribute to future releases of this product, by submitting city-specific training area sets to the LCZ Generator. This community engagement will not only improve the quality of next LCZ map releases, but also contributes to the overall WUDAPT philosophy to provide urban canopy information and modelling infrastructure to facilitate urban-focused climate, weather, air quality, and energy-use modelling application studies (Ching et al., 2018)”*.

## Minor comments

Line 2: Change "as" to "since" and "acknowledged" to "recognized"

We have rephrase this sentence to the following:

*This data can support a range of environmental services, since cities are places of intense resource consumption and waste generation, and of concentrated infrastructure and human settlement exposed to multiple hazards of natural and anthropogenic origin.*

Line 6: Add "and mitigative role" at the end of the sentence

Added.

Line 19: Change "warming" to "climate warming"

Changed.

Line 19 to 20: Rephrase this complex sentence and potentially divide it in two to make it clearer

Unchanged, as we believe this sentence is clear.

Line 34: Change to "and alters the local climate creating specific urban climates" or similar.

We prefer to keep the original sentence, keeping the general focus of altering the “urban climate”.

Line 44: Chose between "distinct urban canopies and boundary layers" or "a distinct urban canopy and related boundary layer".

Changed to *... creating distinct urban canopy and boundary layers.*

Line 46 to 47: I would remove this statement that is not defended by any evidence. Otherwise, put it subjectively (e.g., "could" soon allow; "are expected"...)

Variable-scale (-or resolution) model systems already exist for a while, see eg. Haung et al. (2016) as one of the pioneering studies with a global model, or the more recent work done at CSIRO ([here](#)). Providing more details in the intro is outside the scope of the study, but we do believe it is fair to keep the current statement.

Huang X, Rhoades AM, Ullrich PA, Zarzycki CM. An evaluation of the variable-resolution CESM for modeling California’s climate. *J Adv Model Earth Syst.* 2016;8(1):345-369. doi:10.1002/2015MS000559

Line 48 to 49: Rephrase as "Hence, a comprehensive [...] is needed."

We believe that “What is needed ...” fits better with the structure of the full sentence

Line 53: Change "needed to support" to "required by" and change the final dot to a double point "[...] functions: measures of [...]".

The original sentence is kept, as otherwise the logic of first describing "Measures of form...", and afterwards "Urban functions ...", is lost.

Line 55: "Influences" to "Influence"

Changed.

Line 60: Change "assess" to "test"

We believe "assessment" is the proper term to describe the benefits of climate-based interventions.

Line 64: Add a space between "heat" and "(Demuzere"

Changed.

Line 77: Add "[...] parameters (UCPs) required by urban climate models and by policy-makers to run [...]"

We prefer to keep the original sentence, as we believe that - in general - urban policy-makers do not run models to make informed decisions.

Line 96: Check the citation command for Ching et al. (2018). If LaTeX used, check that for all the manuscript.

Thanks for identifying this typo. This is adjusted.

Since we indeed use LaTeX, the manuscript is checked for the proper use of `\cite{}` and `\citep{}` throughout the manuscript.

Line 108: Change "random forest model" to "random forest classifier".

Changed.

Line 138: Rephrase "one needs" to a less familiar tone

Changed.

Line 164: "2+ million labels", are these TAs or pixels within TA polygons?

Pixels; so individual labels for the RF classifier.

For the final classification, 63847 polygons are used, as indicated in the beginning of the results section.

Line 171: Delete the comma after "a)"

Changed.

Line 195 to 196: Is the "splitting the polygon pool" approach done for the first time in the LCZ mapping or has it been used in previous mapping (e.g., Europe or the US)?

So far, various techniques have been applied. The vast majority of accuracy assessment splits individual pixels. Some others, eg. Demuzere et al. (2020), also performs an accuracy assessment by splitting the TA sample in terms of cities (all-but-one city approach). To the best of our



knowledge, the work of Xu et al. (2021) is the first to explicitly use this "splitting the polygon pool" approach.

Line 291 to 292: Please detail what the "average number of ROIs" is.

"Number" refers to "amount". This has been changed.

Line 322 to 325: This sentence could be moved to the discussion if needed. Otherwise, please suppress it.

This sentence is condensed, just keeping the example of the UHI characterisation.

Figure 9: Could you provide boxplots per ER too?

Thank you for this suggestion. We have created this Figure R3, and added it to the Appendix (Fig. H1), and referenced it in the section where the probabilities are discussed.

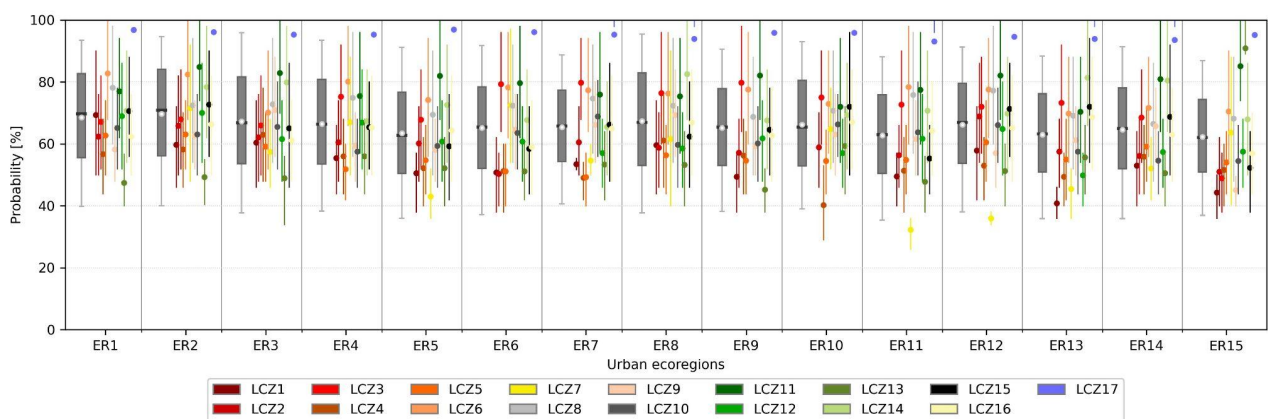

**Figure R3.** Classification probabilities of the mapped LCZ classes, aggregated over all urban centres from GHS-UCDB. The grey boxplots depict the probability distribution for all global urban centres, per ER, with boxes and whiskers spanning the 25-75 and 5-95 percentiles respectively, and means and medians indicated by the white dots and black lines respectively. The vertical lines in the colours of the LCZ classes indicate the 25 to 75th percentile range averaged over the urban centres, with LCZ-colored dots indicating the mean.

Line 388: Why is the slope chosen as a metric for evaluating the classification performance? This is quite uncommon.

We chose to use the slope metric, inspired by the assessment done in Corbane et al. (2021), where they used this metric to assess the quality of the output probabilities in terms of the building footprint reference dataset. It is an easy-to-understand metric that provides a rapid assessment of the predictive power of LCZ-based urban canopy parameters compared to their observed counterparts.

*Corbane C, Syrris V, Sabo F, et al. Convolutional neural networks for global human settlements mapping from Sentinel-2 satellite imagery. Neural Comput Appl. 2021;33(12):6697-6720. doi:10.1007/s00521-020-05449-7*

Line 401 to 403: How is this statement explanatory of the difference between the LCZ-derived AHF and the observation?

We do think that Lines 400-414 provide sufficient context of why AHF is used in the first place (lack of global datasets on thermal and radiative properties of the urban fabric), and why one can not

expect that the generic mean annual AHF value provided by Stewart and Oke (2012) is able to capture the “observed” global variability in AHF, especially in terms of its zonal variation.

Line 407: Chose another word than "zonal"

Zonal is commonly used to refer to variations across latitudes, as is also done in Varquez et al. (2021), their Fig. 5. As such the term is kept here.

Line 422: Please change "Global South" and later "Global North" to other denominations. This concept dates from the 1980s.

This is a valid concern, but we basically just adopted the terminology of the paper that performed this research (Nagendra et al., 2018). We have changed this now to low, middle, and high income countries, a terminology used by the Worldbank.

*Nagendra H, Bai X, Brondizio ES, Lwasa S. The urban south and the predicament of global sustainability. Nat Sustain. 2018;1(7):341-349. doi:10.1038/s41893-018-0101-5*

Line 441 to 442: Do you have a reference to defend that city population is a proxy to urban form?

To clarify, this is not a practice we “defend”. It is merely an observation of what is done elsewhere. We have added some references that use this approach.

Line 453: The works by Potgieter et al. (2021) and Brousse et al. (2022) are suggested as additional references concerning crowdsourced data.

Added.

Line 471: When citing Demuzere et al. (2021a), please refer specifically to the W2W python tool as done for WUDAPT-TO-COSMO.

Adjusted.

Line 510: I suggest changing "surface fractions" to "impervious and built-up surface fractions".

Adjusted.

Line 512: Rephrase this sentence for clarity.

This sentence changed to: “*Confusion may also exist between classes with similar impervious and built-up surface fractions, characterised by similar spectral characteristics (not shown), which can lead to confusion between these classes (see e.g. the confusion between LCZs 3 and 8 in the LCZ map for Lima (Peru, ER11), Fig 7)*”

Please consider checking for American and English spelling discrepancies.

We have removed all American / UK English discrepancies.
